# Supplementary material
Source: publisher figshare collection journal article supplement (https://acs.figshare.com/ndownloader/files/14122784)
Supplement: Supplementary file 1 [file 14122784]

## Short peptide mediated brain targeted drug delivery with enhanced immunocompatibility

Supporting information

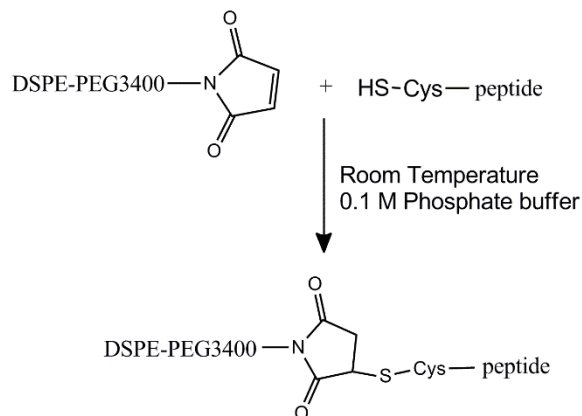

Supplementary Figure S1. Scheme of the chemical synthesis of peptide conjugated PEG3400-DSPE.

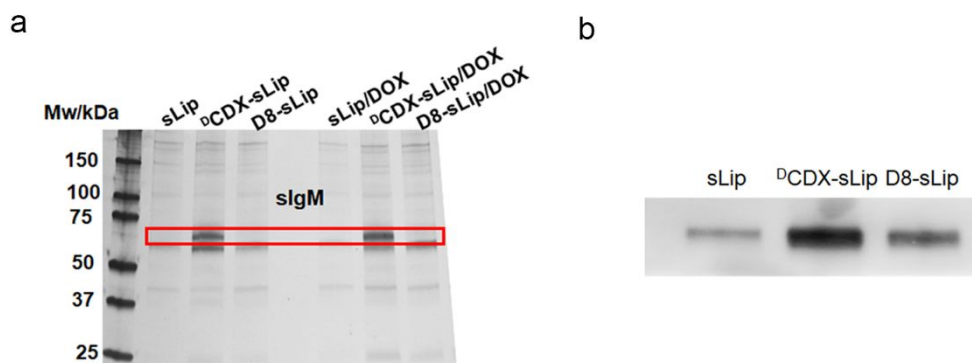

Supplementary Figure S2. Protein corona formed on doxorubicin loaded liposomes after incubation with mouse serum at 37°C for 1 h. a. Separation and staining of protein corona using SDS-PAGE. b. western blot assay of natural IgM absorbed on the surface of liposomes.

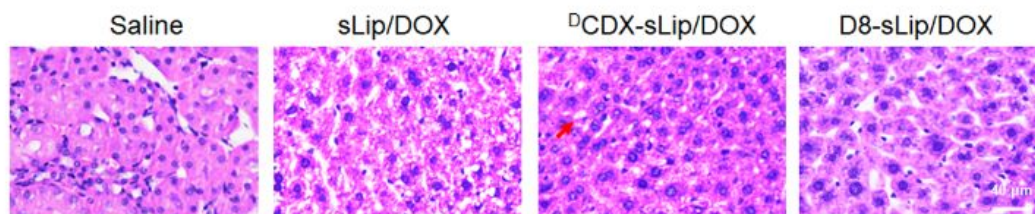

Supplementary Figure S3. Microscopic observation of liver slices after H&E staining.

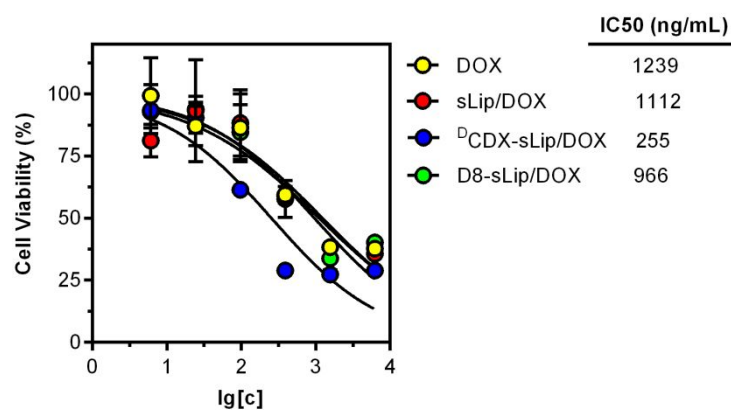

Supplementary Figure S4. Cytotoxicity assay. U87 cells were incubated with different formulations of doxorubicin (free doxorubicin, sLip/DOX, <sup>D</sup>CDX-sLip/DOX, D8-sLip/DOX) of different concentrations and cell viability was measured after 96 h by MTS assay. IC50 values were calculated by GraphPad Prism 6.0 (n = 5).

Supplementary table S1. Peptide sequence.

| Peptide          | Sequence                                                                                                                                                                                                             | Length (AA) |
|------------------|----------------------------------------------------------------------------------------------------------------------------------------------------------------------------------------------------------------------|-------------|
| <sup>D</sup> CDX | G <sup>D</sup> R <sup>D</sup> E <sup>D</sup> I <sup>D</sup> R <sup>D</sup> TG <sup>D</sup> R <sup>D</sup> A <sup>D</sup> E <sup>D</sup> R <sup>D</sup> W <sup>D</sup> S <sup>D</sup> E <sup>D</sup> K <sup>D</sup> F | 16          |
| D8               | <sup>D</sup> RTG <sup>D</sup> R <sup>D</sup> A <sup>D</sup> RE <sup>D</sup> W                                                                                                                                        | 8           |
